# Supplementary material for: Catalytic activation of peroxymonosulfate with manganese cobaltite nanoparticles for the degradation of organic dyes
Source: Royal Society of Chemistry journal article supplement (doi:10.1039/c9ra10169a), 2020-01-01
Supplement: c9ra10169a1.pdf [file c9ra10169a1.pdf]

*Supporting Information*

**Catalytic activation of peroxymonosulfate with manganese cobaltite  
nanoparticles for the degradation of organic dyes**

Nguyen Trung Dung<sup>1</sup>, Tran Viet Thu<sup>2</sup>✉, To Van Nguyen<sup>1</sup>, Bui Minh Thuy<sup>1</sup>, Masahito Hatsukano<sup>3</sup>,  
Koichi Higashimine<sup>3</sup>, Shinya Maenosono<sup>3</sup>, and Ziyi Zhong<sup>4</sup>

<sup>1</sup>*Department of Chemical Engineering, Le Quy Don Technical University, 236 Hoang Quoc Viet, Hanoi  
100000, Vietnam*

<sup>2</sup>*Institute of Research and Development, Duy Tan University, Da Nang 550000, Vietnam*

<sup>3</sup>*School of Materials Science, Japan Advanced Institute of Science and Technology (JAIST), 1-1 Asahidai,  
Nomi, Ishikawa 923-1292, Japan*

<sup>4</sup>*College of Engineering, Guangdong Technion Israel Institute of Technology (GTIIT), 241 Daxue Road,  
Shantou 515063, China*

✉Corresponding authors: E-mail: [tranvietthu1@duytan.edu.vn](mailto:tranvietthu1@duytan.edu.vn); Tel: +84 964 793 732

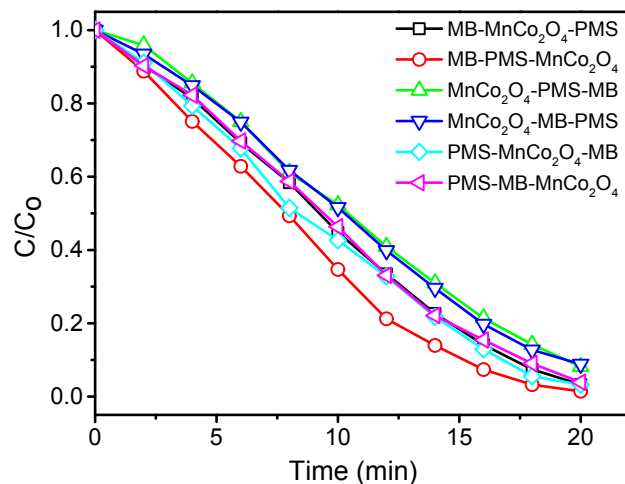

**Figure S1.** Influence of reaction sequence on MB degradation. Initial conditions:  $[\text{Dye}]_0 = 20 \text{ mg L}^{-1}$ ;  $[\text{Oxone}]_0 = 500 \text{ mg L}^{-1}$ ;  $[\text{MnCo}_2\text{O}_{4.5}]_0 = 20 \text{ mg L}^{-1}$ ;  $T = 25 \text{ }^\circ\text{C}$ ; unadjusted pH.

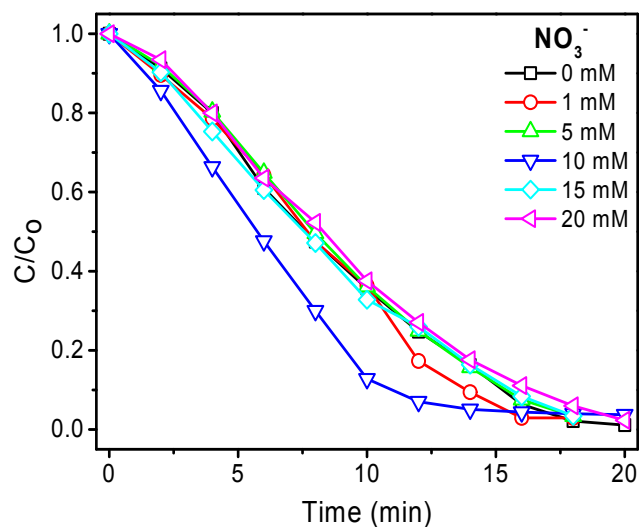

**Figure S2.** Influence of  $\text{NO}_3^-$  concentration on MB degradation. Initial conditions:  $[\text{Dye}]_0 = 20 \text{ mg L}^{-1}$ ;  $[\text{Oxone}]_0 = 500 \text{ mg L}^{-1}$ ;  $[\text{MnCo}_2\text{O}_{4.5}]_0 = 20 \text{ mg L}^{-1}$ ;  $T = 25 \text{ }^\circ\text{C}$ ; unadjusted pH.

**Table S1.** The proposed reactions of coexisting anions with free radicals

| Anion                         | Reaction equation                                                                                                                                | First-order rate constant<br>(mol L <sup>-1</sup> s <sup>-1</sup> ) | Reference |
|-------------------------------|--------------------------------------------------------------------------------------------------------------------------------------------------|---------------------------------------------------------------------|-----------|
| Cl <sup>-</sup>               | SO <sub>4</sub> • <sup>-</sup> + Cl <sup>-</sup> → SO <sub>4</sub> <sup>2-</sup> + Cl•                                                           | 2.3×10 <sup>8</sup>                                                 | [1]       |
|                               | HO• <sup>-</sup> + Cl <sup>-</sup> ↔ ClOH• <sup>-</sup>                                                                                          | 4.2×10 <sup>9</sup>                                                 |           |
|                               | ClOH• <sup>-</sup> + H <sup>+</sup> → Cl• + H <sub>2</sub> O                                                                                     | 6.1×10 <sup>9</sup>                                                 |           |
|                               | Cl• + Cl <sup>-</sup> → Cl <sub>2</sub> • <sup>-</sup>                                                                                           | 7.8×10 <sup>9</sup>                                                 |           |
| HCO <sub>3</sub> <sup>-</sup> | SO <sub>4</sub> • <sup>-</sup> + HCO <sub>3</sub> <sup>-</sup> → SO <sub>4</sub> <sup>2-</sup> + CO <sub>3</sub> • <sup>-</sup> + H <sup>+</sup> | 1.6×10 <sup>6</sup>                                                 | [2]       |
|                               | HO• + HCO <sub>3</sub> <sup>-</sup> → CO <sub>3</sub> • <sup>-</sup> + H <sub>2</sub> O                                                          | 8.5×10 <sup>6</sup>                                                 |           |
| CO <sub>3</sub> <sup>2-</sup> | SO <sub>4</sub> • <sup>-</sup> + CO <sub>3</sub> <sup>2-</sup> → SO <sub>4</sub> <sup>2-</sup> + CO <sub>3</sub> • <sup>-</sup>                  | 6.1×10 <sup>6</sup>                                                 | [2]       |
|                               | HO• + CO <sub>3</sub> <sup>2-</sup> → CO <sub>3</sub> • <sup>-</sup> + HO <sup>-</sup>                                                           | 3.9×10 <sup>8</sup>                                                 |           |
| NO <sub>3</sub> <sup>-</sup>  | SO <sub>4</sub> • <sup>-</sup> + NO <sub>3</sub> <sup>-</sup> → SO <sub>4</sub> <sup>2-</sup> + NO <sub>3</sub> • <sup>-</sup>                   | 5.6×10 <sup>4</sup>                                                 | [3]       |
|                               | HO• + NO <sub>3</sub> <sup>-</sup> → NO <sub>3</sub> • <sup>-</sup> + HO <sup>-</sup>                                                            | N/A                                                                 |           |

**Table S2.** Some physicochemical properties of H<sub>2</sub>O<sub>2</sub>, PS and PMS

| Oxidant                       | Oxidative structure                                            | O–O bonding energy<br>(E, kJ mol <sup>-1</sup> ) | E <sup>0</sup> | pK <sub>a</sub>                                                                                         | Reference |
|-------------------------------|----------------------------------------------------------------|--------------------------------------------------|----------------|---------------------------------------------------------------------------------------------------------|-----------|
| H <sub>2</sub> O <sub>2</sub> | H–O–O–H                                                        | 213.3                                            | 1.78           | H <sub>2</sub> O <sub>2</sub> → HO <sub>2</sub> <sup>-</sup> + H <sup>+</sup><br>pK <sub>a</sub> = 11   | [4]       |
| PS                            | SO <sub>3</sub> <sup>-</sup> –O–O–SO <sub>3</sub> <sup>-</sup> | 140                                              | 2.01           | No change in dissociation form pH > 3                                                                   | [4]       |
| PMS                           | H–O–O–SO <sub>3</sub> <sup>-</sup>                             | 140 < E <sub>PMS</sub> < 213.3                   | 1.82           | HSO <sub>5</sub> <sup>-</sup> → SO <sub>5</sub> <sup>2-</sup> + H <sup>+</sup><br>pK <sub>a</sub> = 9.4 | [5]       |

## References

- [1] J. Zhang, M. Chen, L.J.R.A. Zhu, Activation of persulfate by Co<sub>3</sub>O<sub>4</sub> nanoparticles for orange G degradation, 6 (2016) 758-768.
- [2] L. Hou, X. Li, Q. Yang, F. Chen, S. Wang, Y. Ma, Y. Wu, X. Zhu, X. Huang, D.J.S.o.T.T.E. Wang, Heterogeneous activation of peroxymonosulfate using Mn-Fe layered double hydroxide: Performance and mechanism for organic pollutant degradation, 663 (2019) 453-464.
- [3] S. Yang, P. Wang, X. Yang, L. Shan, W. Zhang, X. Shao, R.J.J.o.h.m. Niu, Degradation efficiencies of azo dye Acid Orange 7 by the interaction of heat, UV and anions with common oxidants: persulfate, peroxymonosulfate and hydrogen peroxide, 179 (2010) 552-558.
- [4] S. Yang, P. Wang, X. Yang, L. Shan, W. Zhang, X. Shao, R. Niu, Degradation efficiencies of azo dye Acid Orange 7 by the interaction of heat, UV and anions with common oxidants: persulfate, peroxymonosulfate and hydrogen peroxide, Journal of Hazardous Materials, 179 (2010) 552-558.
- [5] T. Zhang, H. Zhu, J.-P. Croue, Production of sulfate radical from peroxymonosulfate induced by a magnetically separable CuFe<sub>2</sub>O<sub>4</sub> spinel in water: efficiency, stability, and mechanism, Environmental science & technology, 47 (2013) 2784-2791.
